# Supplementary material for: Indirect immobilized Jagged1 suppresses cell cycle progression and induces odonto/osteogenic differentiation in human dental pulp cells
Source: PubMed Central journal article supplement (PMC5578993; doi:10.1038/s41598-017-10638-x), 2017-08-31
Supplement: 41598_2017_10638_MOESM1_ESM.pdf [file 41598_2017_10638_MOESM1_ESM.pdf]

**Indirect immobilized Jagged1 suppresses cell cycle progression and induces  
odonto/osteogenic differentiation in human dental pulp cells**

Jeeranan Manokawinchoke<sup>1,2</sup>, Praphawi Nattasit<sup>1</sup>, Tanutchaporn Thongngam<sup>1</sup>, Prasit Pavasant<sup>1,2</sup>, Kevin A. Tompkins<sup>1,3</sup>, Hiroshi Egusa<sup>4</sup>, Thanaphum Osathanon<sup>1,2,\*</sup>

<sup>1</sup>Excellence Center in Regenerative Dentistry, Faculty of Dentistry, Chulalongkorn University, Bangkok, 10330 Thailand

<sup>2</sup>Department of Anatomy, Faculty of Dentistry, Chulalongkorn University, Bangkok, 10330 Thailand

<sup>3</sup>Office of Research Affairs, Faculty of Dentistry, Chulalongkorn University, Bangkok, 10330 Thailand

<sup>4</sup>Division of Molecular and Regenerative Prosthodontics, Tohoku University Graduate School of Dentistry, Sendai 980-8575, JAPAN

**\*Corresponding author**

Associate Professor Thanaphum Osathanon, DDS, PhD

Department of Anatomy, Faculty of Dentistry,

Chulalongkorn University, Bangkok, 10330 Thailand

Tel: +66-2-218-8885

Fax: +66-2-218-8870

Email: [thanaphum.o@chula.ac.th](mailto:thanaphum.o@chula.ac.th)

**Supplementary Table 1.** List of the downregulated genes in the cell cycle pathway based on the enriched KEGG pathway analysis.

| <b>Gene Symbol</b> | <b>Gene Name</b>                                                                        | <b>EntrezGene</b> |
|--------------------|-----------------------------------------------------------------------------------------|-------------------|
| <b>CCNE2</b>       | cyclin E2                                                                               | 9134              |
| <b>MCM6</b>        | minichromosome maintenance complex component 6                                          | 4175              |
| <b>PTTG1</b>       | pituitary tumor-transforming 1                                                          | 9232              |
| <b>ORC1</b>        | origin recognition complex, subunit 1                                                   | 4998              |
| <b>CCNB1</b>       | cyclin B1                                                                               | 891               |
| <b>MCM4</b>        | minichromosome maintenance complex component 4                                          | 4173              |
| <b>CDKN2C</b>      | cyclin-dependent kinase inhibitor 2C (p18, inhibits CDK4)                               | 1031              |
| <b>CCND1</b>       | cyclin D1                                                                               | 595               |
| <b>WEE1</b>        | WEE1 homolog (S. pombe)                                                                 | 7465              |
| <b>CCNA2</b>       | cyclin A2                                                                               | 890               |
| <b>MCM5</b>        | minichromosome maintenance complex component 5                                          | 4174              |
| <b>TTK</b>         | TTK protein kinase                                                                      | 7272              |
| <b>BUB1</b>        | budding uninhibited by benzimidazoles 1 homolog (yeast)                                 | 699               |
| <b>CDC25A</b>      | cell division cycle 25 homolog A (S. pombe)                                             | 993               |
| <b>CDC20</b>       | cell division cycle 20 homolog (S. cerevisiae)                                          | 991               |
| <b>BUB1B</b>       | budding uninhibited by benzimidazoles 1 homolog beta (yeast)                            | 701               |
| <b>CDC6</b>        | cell division cycle 6 homolog (S. cerevisiae)                                           | 990               |
| <b>PKMYT1</b>      | protein kinase, membrane associated tyrosine/threonine 1                                | 9088              |
| <b>MCM2</b>        | minichromosome maintenance complex component 2                                          | 4171              |
| <b>CDK1</b>        | cyclin-dependent kinase 1                                                               | 983               |
| <b>CDC45</b>       | cell division cycle 45 homolog (S. cerevisiae)                                          | 8318              |
| <b>RBL1</b>        | retinoblastoma-like 1 (p107)                                                            | 5933              |
| <b>MAD2L1</b>      | MAD2 mitotic arrest deficient-like 1 (yeast)                                            | 4085              |
| <b>TFDP1</b>       | transcription factor Dp-1                                                               | 7027              |
| <b>E2F1</b>        | E2F transcription factor 1                                                              | 1869              |
| <b>SMC1A</b>       | structural maintenance of chromosomes 1A                                                | 8243              |
| <b>CDK2</b>        | cyclin-dependent kinase 2                                                               | 1017              |
| <b>E2F2</b>        | E2F transcription factor 2                                                              | 1870              |
| <b>YWHAH</b>       | tyrosine 3-monooxygenase/tryptophan 5-monooxygenase activation protein, eta polypeptide | 7533              |
| <b>CCNB2</b>       | cyclin B2                                                                               | 9133              |
| <b>ESPL1</b>       | extra spindle pole bodies homolog 1 (S. cerevisiae)                                     | 9700              |
| <b>MCM3</b>        | minichromosome maintenance complex component 3                                          | 4172              |
| <b>ORC6</b>        | origin recognition complex, subunit 6                                                   | 23594             |

**Supplementary Table 2.** List of downregulated genes in DNA replication pathway based on enrich KEGG pathway analysis.

| <b>Gene Symbol</b> | <b>Gene Name</b>                                        | <b>EntrezGene</b> |
|--------------------|---------------------------------------------------------|-------------------|
| <b>MCM4</b>        | minichromosome maintenance complex component 4          | 4173              |
| <b>POLA2</b>       | polymerase (DNA directed), alpha 2, accessory subunit   | 23649             |
| <b>MCM6</b>        | minichromosome maintenance complex component 6          | 4175              |
| <b>RFC3</b>        | replication factor C (activator 1) 3, 38kDa             | 5983              |
| <b>POLE</b>        | polymerase (DNA directed), epsilon, catalytic subunit   | 5426              |
| <b>POLE2</b>       | polymerase (DNA directed), epsilon 2, accessory subunit | 5427              |
| <b>PRIM2</b>       | primase, DNA, polypeptide 2 (58kDa)                     | 5558              |
| <b>POLA1</b>       | polymerase (DNA directed), alpha 1, catalytic subunit   | 5422              |
| <b>MCM5</b>        | minichromosome maintenance complex component 5          | 4174              |
| <b>LIG1</b>        | ligase I, DNA, ATP-dependent                            | 3978              |
| <b>RNASEH2A</b>    | ribonuclease H2, subunit A                              | 10535             |
| <b>MCM2</b>        | minichromosome maintenance complex component 2          | 4171              |
| <b>FEN1</b>        | flap structure-specific endonuclease 1                  | 2237              |
| <b>MCM3</b>        | minichromosome maintenance complex component 3          | 4172              |
| <b>RPA1</b>        | replication protein A1, 70kDa                           | 6117              |

Supplementary Table 3. Primer sequences

| Gene                 | Primer sequences (F=forward, R=Reverse) |                                 | Accession number |
|----------------------|-----------------------------------------|---------------------------------|------------------|
| <b>Real-time PCR</b> |                                         |                                 |                  |
| <i>GAPDH</i>         | F                                       | 5'-TCATGGGTGTGAACCATGAGAA-3'    | NM_002046.3      |
|                      | R                                       | 5'-GGCATGGACTGTGGTCATGAG-3'     |                  |
| <i>HES1</i>          | F                                       | 5'-AGGCGGACATTCTGGAAATG-3'      | NM_005524.2      |
|                      | R                                       | 5'-CGGTACTTCCCCAGCACACTT-3'     |                  |
| <i>HEY1</i>          | F                                       | 5'-CTGCAGATGACCGTGGATCA-3'      | NM_012258.3      |
|                      | R                                       | 5'-CCAAACTCCGATAGTCCATAGCAA-3'  |                  |
| <i>RUNX2</i>         | F                                       | 5'-ATGATGACACTGCCACCTCTGA-3'    | NM_001024630.3   |
|                      | R                                       | 5'-GGCTGGATAGTGCATTCGTG-3'      |                  |
| <i>OSX</i>           | F                                       | 5'-GCCAGAAGCTGTGAAACCTC-3'      | NM_152860.1      |
|                      | R                                       | 5'-GCTGCAAGCTCTCCATAACC-3'      |                  |
| <i>MSX2</i>          | F                                       | 5'-GGTTTCCTCTCCCTCTCCAC-3'      | NM_002449.4      |
|                      | R                                       | 5'-GGCTTGGTGCCTCCGCCTAC-3'      |                  |
| <i>OPN</i>           | F                                       | 5'-AGGAGGAGGCAGAGCACA-3'        | NM_001040060.1   |
|                      | R                                       | 5'-CTGGTATGGCACAGGTGATG-3'      |                  |
| <i>COL1</i>          | F                                       | 5'-GTGCTAAAGGTGCCAATGGT-3'      | NM_000088.3      |
|                      | R                                       | 5'-ACCAGGTTACCGCTGTTAC-3'       |                  |
| <i>OCN</i>           | F                                       | 5'-CTTTGTGTCCAAGCAGGAGG-3'      | NM_199173.4      |
|                      | R                                       | 5'-CTGAAAGCCGATGTGGTCAG-3'      |                  |
| <i>DMP1</i>          | F                                       | 5'-CAGGAGCACAGGAAAAGGAG-3'      | NM_004407.3      |
|                      | R                                       | 5'-CTGGTGGTATCTTGGGCACT-3'      |                  |
| <i>DSPP</i>          | F                                       | 5'-ATATTGAGGGCTGGAATGGGGA-3'    | NM_014208.3      |
|                      | R                                       | 5'-TTTGTGGCTCCAGCATTGTCA-3'     |                  |
| <i>BMP2</i>          | F                                       | 5'-GCGTGAAAAGAGAGACTGC-3'       | NM_001200.2      |
|                      | R                                       | 5'-CCATTGAAAGAGCGTCCAC-3'       |                  |
| <i>TWIST1</i>        | F                                       | 5'-TCTTACGAGGAGCTGCAGACGCA-3'   | NM_000474.3      |
|                      | R                                       | 5'-ATCTTGGAGTCCAGCTCGTCGCT-3'   |                  |
| <i>TWIST2</i>        | F                                       | 5'-GCTGCGCAAGATCATCCC-3'        | NM_057179.2      |
|                      | R                                       | 5'-GTAGCTGCAGCTGGTCATC-3'       |                  |
| <i>ALP</i>           | F                                       | 5'-CGAGATACAAGCACTCCCCTTC-3'    | NM_000478.3      |
|                      | R                                       | 5'-CTGTTTCAGCTCGTACTGCATGTC-3'  |                  |
| <i>NOTCH1</i>        | F                                       | 5'-AGGACCTCATCAACTCACACGC-3'    | NM_017617.3      |
|                      | R                                       | 5'-TCTTTGTTAGCCCCGTTCTTCAG-3'   |                  |
| <i>NOTCH2</i>        | F                                       | 5'-CCGTGTTGACTTCTGCTCTCTCAC-3'  | NM_024408.3      |
|                      | R                                       | 5'-CCTACTACCCTTGGCCTCCTTTG-3'   |                  |
| <i>NOTCH3</i>        | F                                       | 5'-TCTCAGACTGGTCCGAATCCAC-3'    | NM_000435.2      |
|                      | R                                       | 5'-ACACTTGCCTCTTGGGGGTAAC-3'    |                  |
| <i>NOTCH4</i>        | F                                       | 5'-ATGCGAGGAAGATACGGAGTGG-3'    | NM_004557.3      |
|                      | R                                       | 5'-TCGGAATGTTGGAGGCAGAAC-3'     |                  |
| <i>FOXS1</i>         | F                                       | 5'-CAGGAATGTTCTTCTTTGAGT-3'     | NM_004118.3      |
|                      | R                                       | 5'-GTCCTTCGAGAGTTCTTCAG-3'      |                  |
| <i>PDGFA</i>         | F                                       | 5'-TCGATGAGATGGAGGGTCG-3'       | NM_002607.5      |
|                      | R                                       | 5'-ACCCGGACAGAAATCCAGTCT-3'     |                  |
| <i>NGF</i>           | F                                       | 5'-CATGCTGGACCCAAGCTCA-3'       | NM_002506.2      |
|                      | R                                       | 5'-GACATTACGCTATGCACCTCAGTG-3'  |                  |
| <i>DKK2</i>          | F                                       | 5'-AGTGTGAAGTTGGGAGGTATTGCC-3'  | NM_014421.2      |
|                      | R                                       | 5'-TGCCATTATTGCAGCGGGTACTG-3'   |                  |
| <i>SOST</i>          | F                                       | 5'-ACTTCAGAGGAGGCAGAAATGG-3'    | NM_025237.2      |
|                      | R                                       | 5'-CAAGGGGGAATCTTATCCAACCTTC-3' |                  |

|                         |   |                                 |                |
|-------------------------|---|---------------------------------|----------------|
| <b><i>PDGFD</i></b>     | F | 5'-GTGGAGGAAATTGTGGCTGT-3'      | NM_025208.4    |
|                         | R | 5'-CGTTCATGGTGATCCAACCTG-3'     |                |
| <b><i>LRP5</i></b>      | F | 5'-ATCAACGTCCACAGGCTGA-3'       | NM_002335.3    |
|                         | R | 5'-CCTGCATGTTGGTGAAGTACA-3'     |                |
| <b><i>E2F1</i></b>      | F | 5'-GACCCTGACCTGCTGCTCT-3'       | NM_005225.2    |
|                         | R | 5'-GGCCAGGTAAGTATGGTCA-3'       |                |
| <b><i>E2F2</i></b>      | F | 5'-CAAGTTGTGCGATGCCTG-3'        | NM_004091.3    |
|                         | R | 5'-TTGGGAACCTCAGGGACGA-3'       |                |
| <b><i>MCM2</i></b>      | F | 5'-AATTTTCGTCTGGGTCTTT-3'       | NM_004526.3    |
|                         | R | 5'-CACTTTGCCTGGACTCTCCT-3'      |                |
| <b><i>MCM4</i></b>      | F | 5'-TTCTTTGACCGTTACCCTGA-3'      | NM_005914.3    |
|                         | R | 5'-ACACTTGGCACTGGAAGAAG-3'      |                |
| <b><i>MCM5</i></b>      | F | 5'-TATTGCCTACTGCCGAGTGA-3'      | NM_006739.3    |
|                         | R | 5'-ACTGTCCCTCTCGTGCTGAC-3'      |                |
| <b><i>MCM8</i></b>      | F | 5'-CCAGGCCTAGGAAAAAGTCA-3'      | NM_032485.5    |
|                         | R | 5'-GAGGTGGTCGTGGTGTTACC-3'      |                |
| <b><i>MCM10</i></b>     | F | 5'-CCGTCTGCAAAAATCCCCTGAGA-3'   | NM_018518.4    |
|                         | R | 5'-ATGAGCTTTTGGGATCTGGAGGTG-3'  |                |
| <b><i>CCND1</i></b>     | F | 5'-GGCGGAG GAGAACAACAGA-3'      | NM_053056.2    |
|                         | R | 5'-ATGGAGGGCGGATTGGAAA-3'       |                |
| <b><i>CCNE2</i></b>     | F | 5'-GCCGAGCGGTAGCTGGTC-3'        | NM_057749.2    |
|                         | R | 5'-GGGCTGCTGCTTAGCTTGTA-3'      |                |
| <b><i>TGF-β1</i></b>    | F | 5'-GGATACCAACTATTGCTTCAGCTCC-3' | NM_000660.4    |
|                         | R | 5'-AGGCTCCAAATGTAGGGGCAGGGCC-3' |                |
| <b><i>TGFβ2</i></b>     | F | 5'-ATTGCCCTCCTACAGACTTGAG-3'    | NM_001135599.2 |
|                         | R | 5'-CAGCACAGAAGTTGGCATTGTA-3'    |                |
| <b><i>TGFβ3</i></b>     | F | 5'-GGTTTTCCGCTTCAATGTGT-3'      | NM_003239.2    |
|                         | R | 5'-GCTCGATCCTCTGCTCATTC-3'      |                |
| <b>Conventional PCR</b> |   |                                 |                |
| <b><i>CD44</i></b>      | F | 5'-GGCCCAGATGGAGAAAGCTCTGAGC-3' | NM_00610.3     |
|                         | R | 5'-GAAGCAATATGTGTCATACTGGGAG-3' |                |
| <b><i>CD73</i></b>      | F | 5'-ACACTTGGCCAGTAAAATAGGG-3'    | NM_002526.2    |
|                         | R | 5'-ATTGCAAAGTGGTTCAAAGTCA-3'    |                |
| <b><i>CD90</i></b>      | F | 5'-GAAGACCCCAGTCCAGATCCA-3'     | NM_006288.4    |
|                         | R | 5'-TGCTGGTATTCTCATGGCGG-3'      |                |
| <b><i>CD105</i></b>     | F | 5'-CATCACCTTTGGTGCCTTCC-3'      | NM_001114753.1 |
|                         | R | 5'-CTATGCCATGCTGCTGGTGG-3'      |                |
| <b><i>GAPDH</i></b>     | F | 5'-TGAAGGTCGGAGTCAACGGAT-3'     | NM_002046.3    |
|                         | R | 5'-TCACACCCATGACGAACATGG-3'     |                |

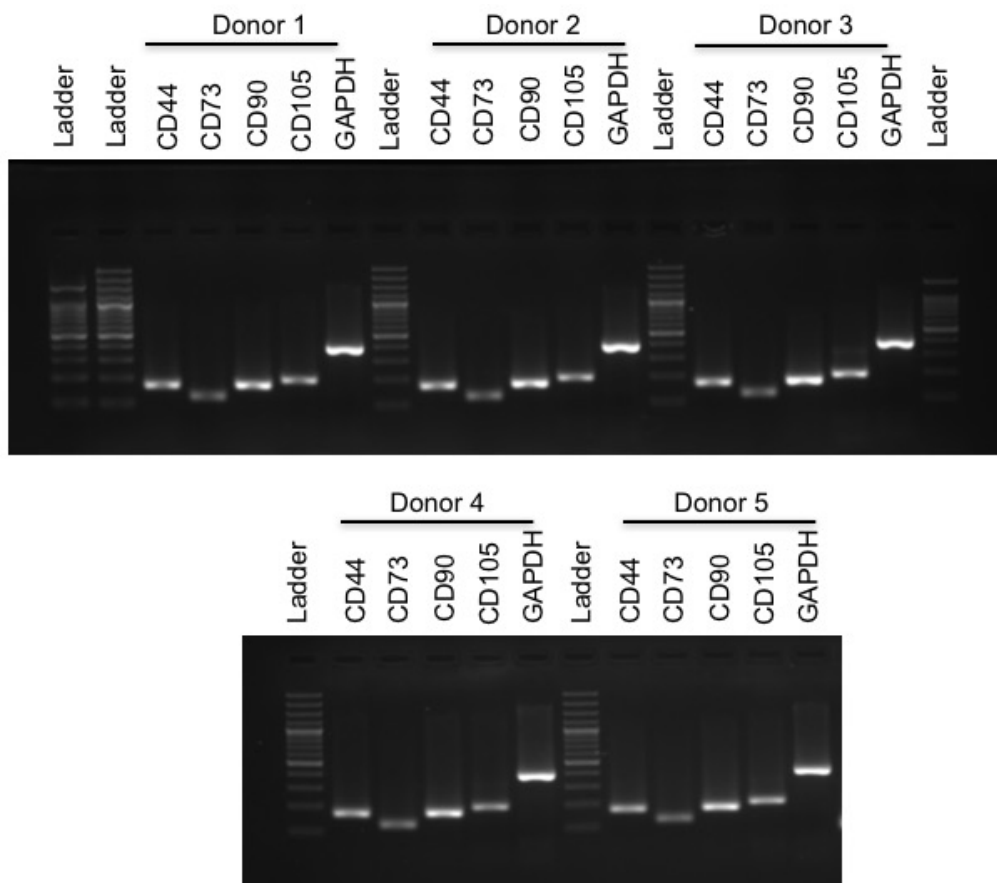

**Supplementary Figure 1.** Conventional polymerase chain reaction demonstrated the mRNA expression of mesenchymal stem cell marker from 5 donors.

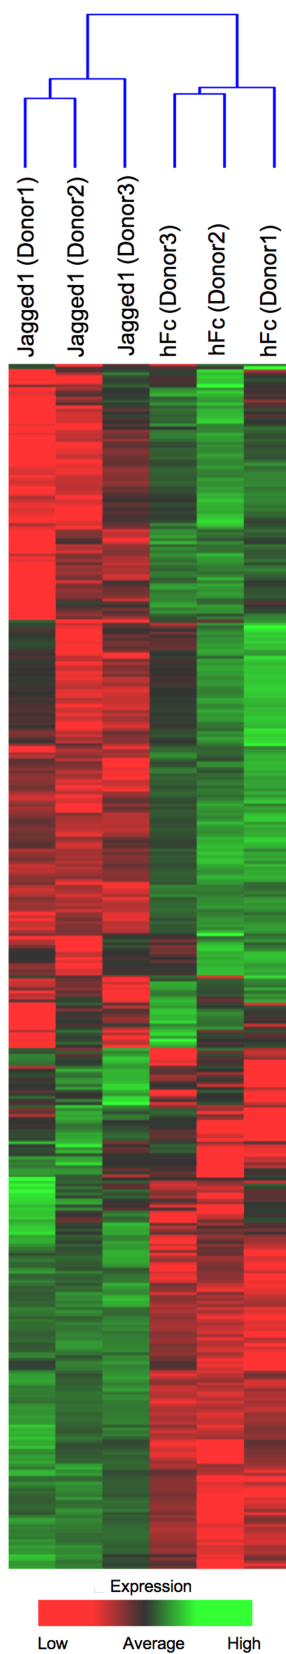

**Supplementary Figure 2.** Heat map representing the differential gene expression (A). Color codes range from red (low expression) to green (high expression).

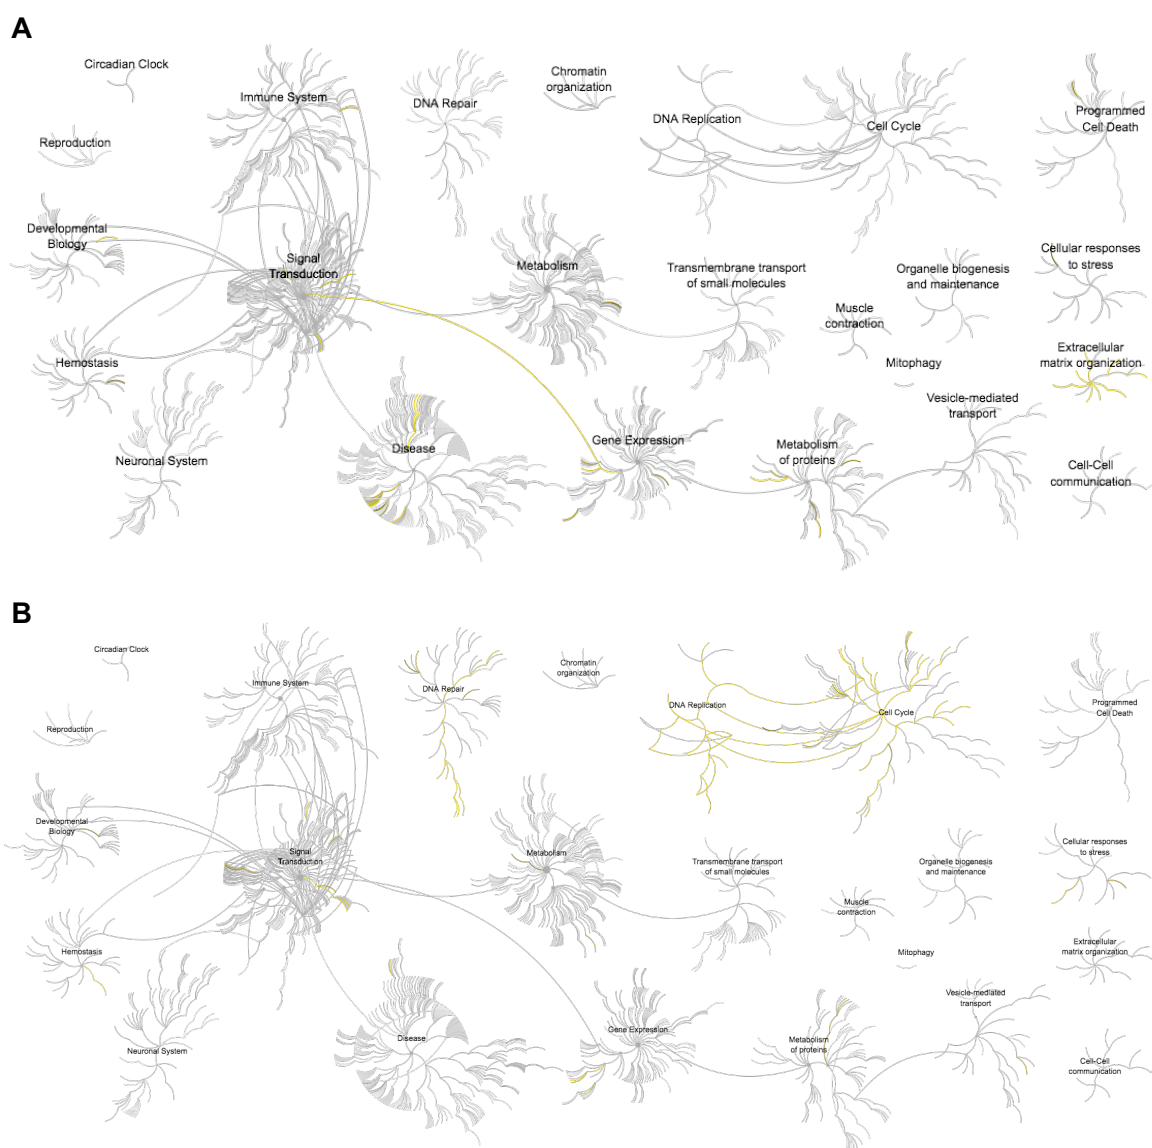

**Supplementary Figure 3. Differentially expressed pathways in Jagged1 treated hDPs determined by the Reactome pathway database analysis.** The differentially expressed genes were analyzed using an online bioinformatic tool to identify related affected pathways. The diagrams illustrated the upregulated (A) and down regulated (B) pathways.



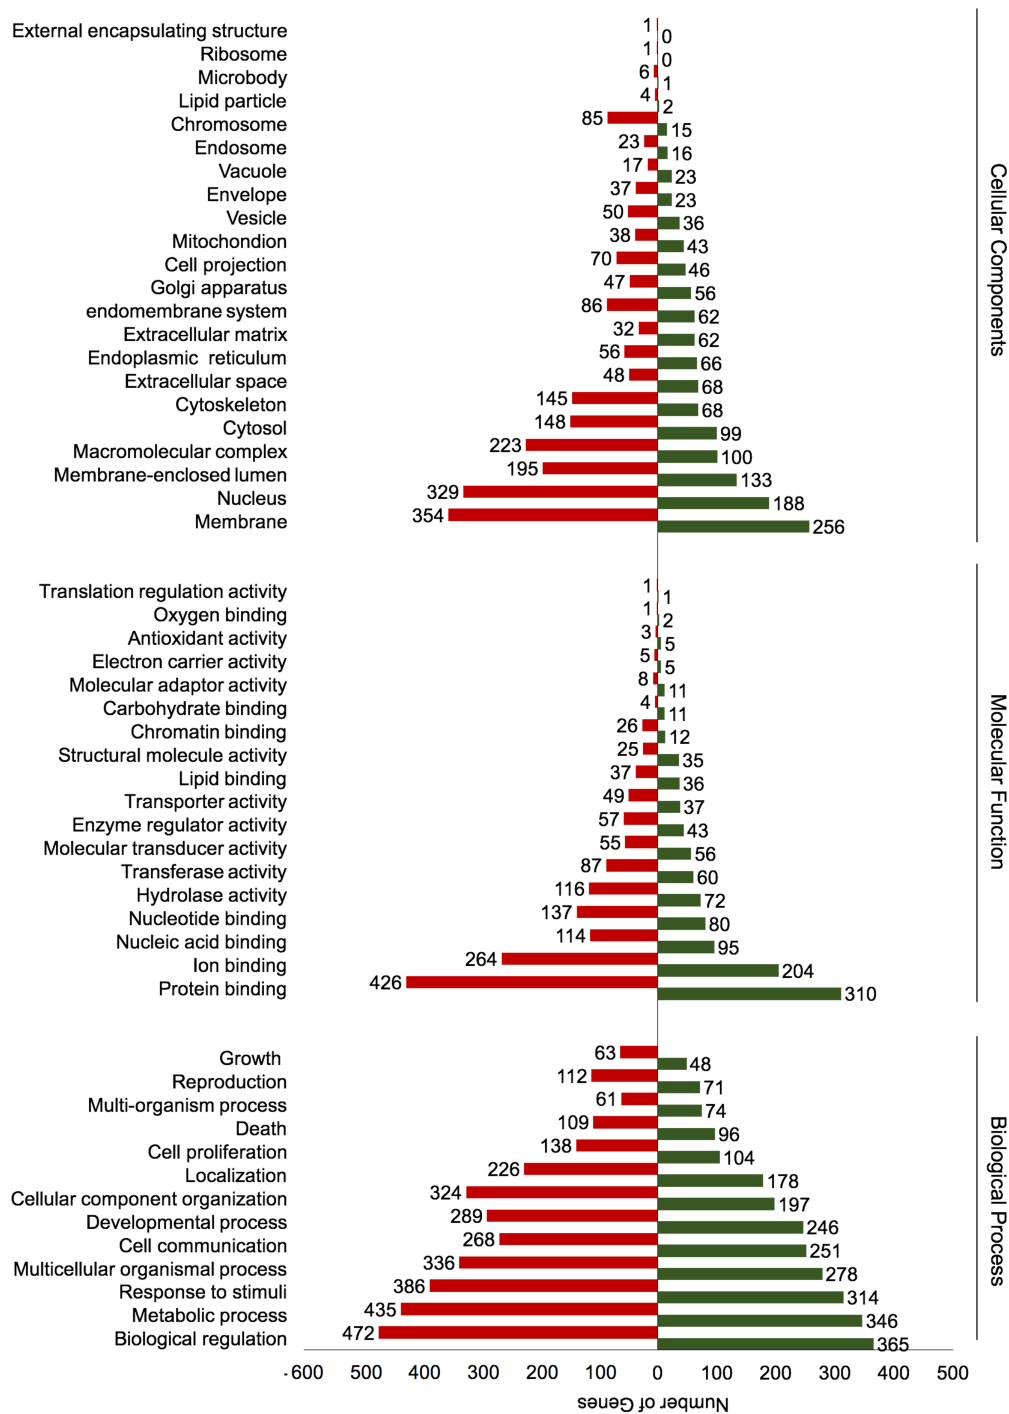

**Supplementary Figure 4. Gene ontology evaluation of the differentially expressed genes.**

Gene ontology classification was analyzed using WebGestalt. Green and red bars represent the upregulated and downregulated genes, respectively.

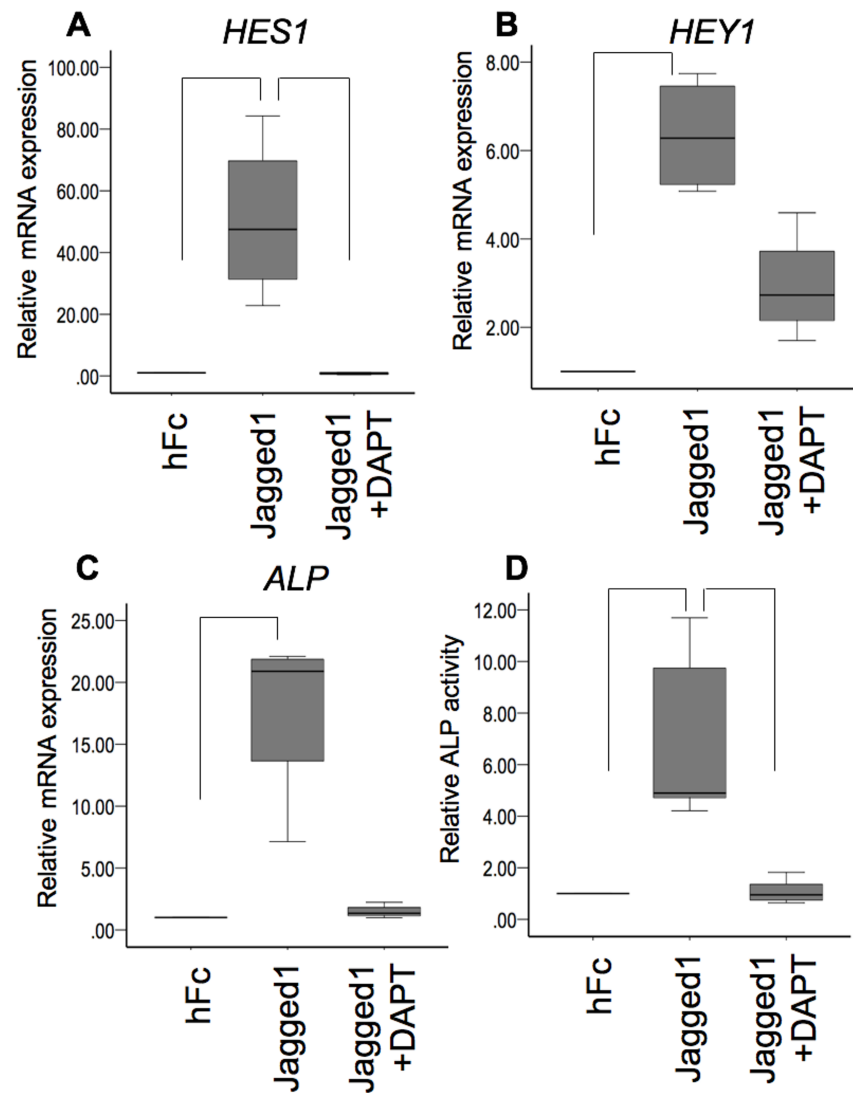

**Supplementary Figure 5.  $\gamma$ -secretase inhibitor abolished Jagged1-induced ALP activity and mineral deposition.** hDPs were seeded on indirect immobilized Jagged1 surfaces and maintained in osteogenic medium for 7 days. Some cells were pretreated with DAPT, a  $\gamma$ -secretase inhibitor, 30 min prior to Jagged1 exposure. The mRNA levels of *HES1* (A), *HEY1* (B), and *ALP* (C) were measured using real-time polymerase chain reaction. ALP enzymatic activity was evaluated (D). Bars indicate a significant difference between groups ( $p < 0.05$ ).

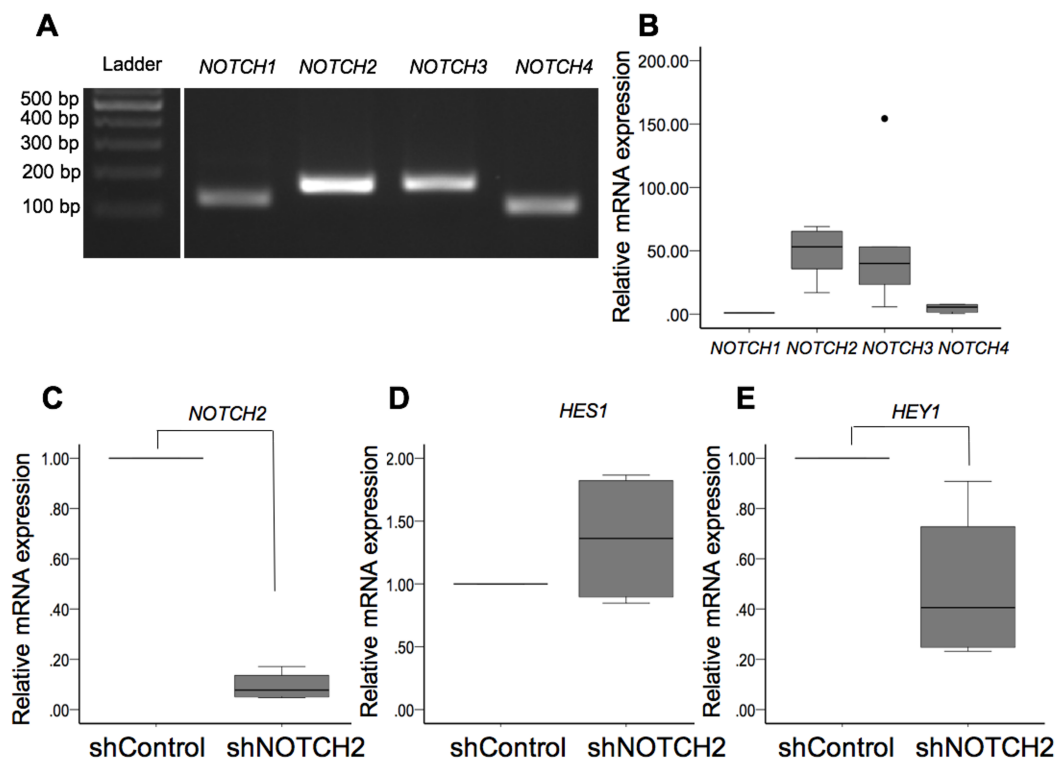

**Supplementary Figure 6. Characterization of the hDPs transduced with shRNA against *NOTCH2*.** Baseline mRNA expression of Notch receptors was evaluated using conventional (A) and real-time polymerase chain reaction (B). hDPs were transduced with *NOTCH2* shRNA. The mRNA expression of *HES1* (C), *HEY1* (D), and *NOTCH2* (E) was evaluated using real-time polymerase chain reaction. Bars indicate a significant difference between groups ( $p < 0.05$ ). Black dot (●) indicates an outlier data point.

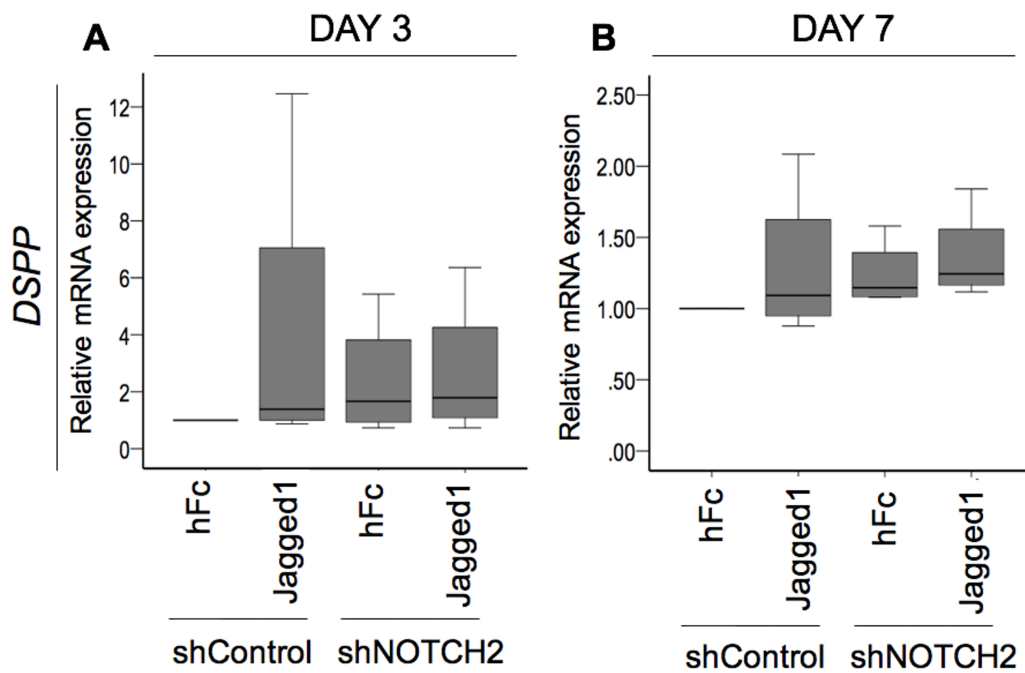

**Supplementary Figure 7. NOTCH2 participated in Jagged1 induced odonto/osteogenic differentiation by hDPs.** The shNOTCH2 and shControl transduced hDPs were seeded on indirect immobilized Jagged1 or the hFc control surfaces and maintained in osteogenic medium for 3 (A) and 7 days (B). The *DSPP* mRNA expression was observed using real-time polymerase chain reaction.

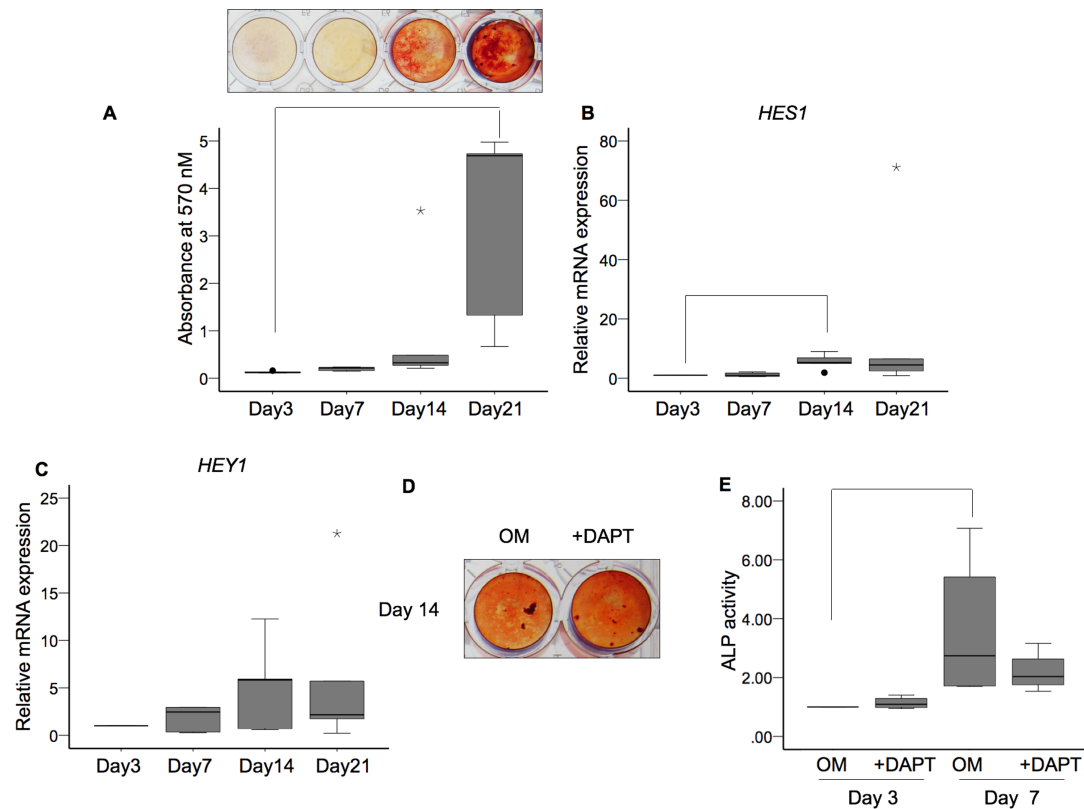

### Supplementary Figure 8. Endogeneous Notch signaling in odonto/osteogenic

**differentiation by hDPs.** hDPs were cultured in osteogenic medium and the mineral deposition was stained by Alizarin Red S staining (A). The mRNA expression of Notch target genes, *HES1* and *HEY1*, was evaluated in hDPs at different time points during odonto/osteogenic induction (B–C). hDPs were cultured in osteogenic medium for 14 days with or without the Notch signaling inhibitor DAPT. Mineral deposition was evaluated using Alizarin Red S staining (D). ALP enzymatic activity was evaluated when the hDPs were cultured in osteogenic medium with or without DAPT for 3 and 7 days (E). Bars indicate a significant difference between groups ( $p < 0.05$ ). Black dots (●) indicate outlier data points. Asterisks (\*) indicate extreme outlier data points.
